# Supplementary material for: Recognition of algae by microcontact-imprinted polymers modulates hydrogenase expression
Source: Royal Society of Chemistry journal article supplement (doi:10.1039/c4ra11132j), 2014-01-01
Supplement: c4ra11132j1.pdf [file c4ra11132j1.pdf]

**Electronic supplementary material:**

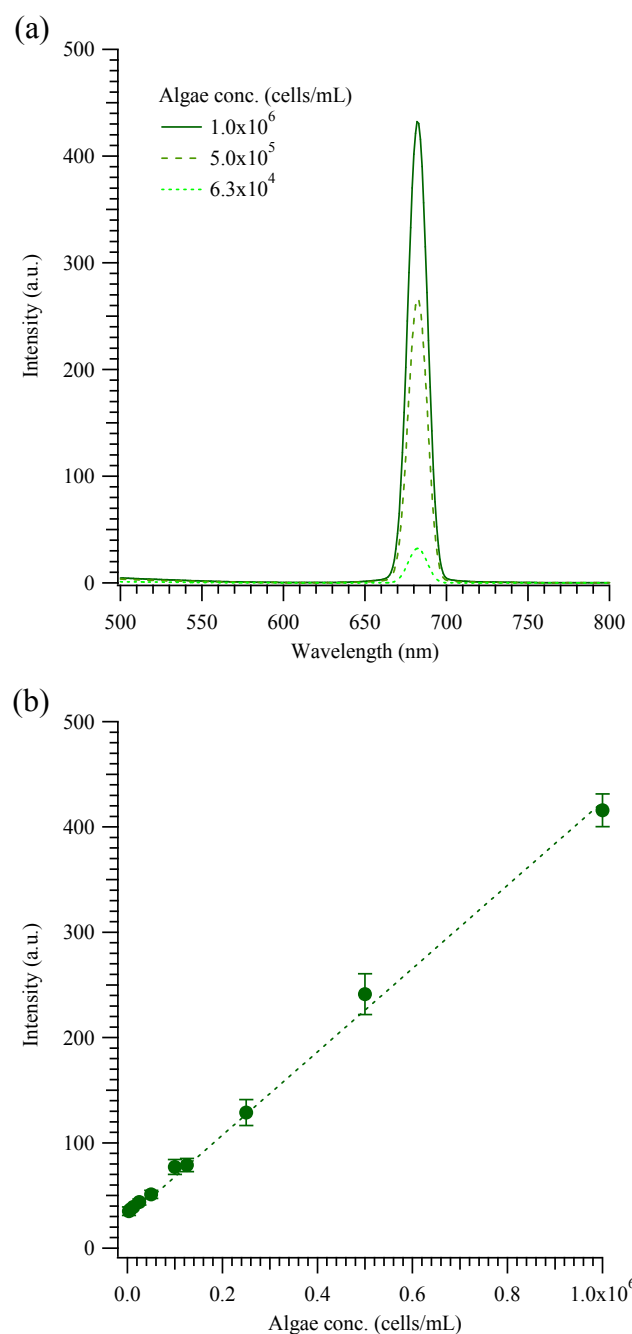

Figure S-1. (a) The emission spectrum and (b) the calibration curve of fluorescence intensity for the algae concentrations.
